# Supplementary material for: Formation of Formaldehyde and Other Byproducts by TiO2 Photocatalyst Materials
Source: MDPI journal article supplement (doi:10.3390/su13094821), 2021-04-25
Supplement: s1 [file s1]

# Supplementary Information

## 1. Supplementary Information

### 1.1. Surface morphology

Four samples ( $\text{TiO}_2$ , AC,  $\text{TiO}_2$  / AC (ratio 1:1) and  $\text{TiO}_2$  / AC (ratio 1:5)) were characterized with SEM. Figure S1-A shows that the  $\text{TiO}_2$  particles tend to agglomerate into micrometer-sized clusters. Figure S1-B is a typical AC particle. The generally observed AC particle size was in good agreement with the company's claim of 20  $\mu\text{m}$  on average. Although other SEM images showed the AC powder to have quite diverse morphologies, as can be seen from Figure S1, one particular morphology was seen repeatedly, shown in Figure 1-B and D: a hexagonal form with sharp corners and a cylindrical hole in the middle, either seen as a honeycomb structure or long hexagonal fibers. Similar observations have been made by Rusheng et al.[1]. The same authors also found their nanosized  $\text{TiO}_2$ , agglomerated into micrometer-sized clusters. Pure  $\text{TiO}_2$  particles (white particles shown in the figures) (Figure S1) were evenly distributed, compared to activated carbon, the size of  $\text{TiO}_2$  was relatively small. Activated carbon (Figure 1 B) As can be seen in Figure S1 C/D, after synthesis,  $\text{TiO}_2$  was coated on the surface of activated carbon. The porosity of the  $\text{TiO}_2$  was 81.0 %, which resulted in a negligible pressure drop along the reactor. The specific surface area of  $\text{TiO}_2$  was 1.52  $\text{m}^2/\text{g}$ .

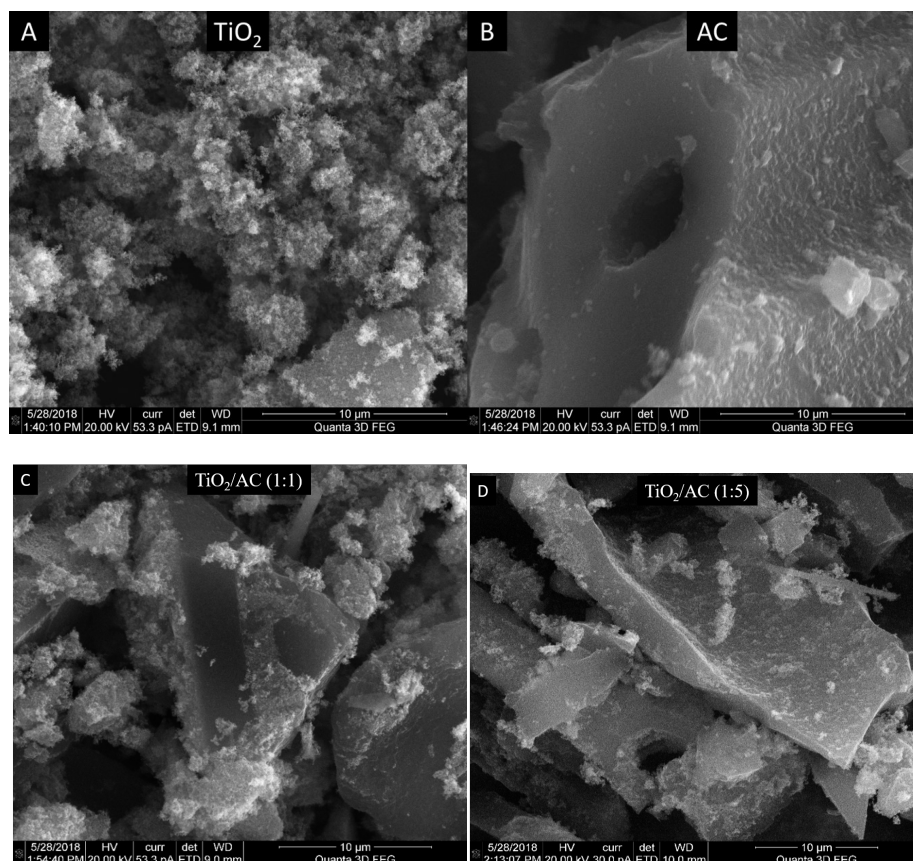

**Figure 1.** SEM images of samples. A:  $\text{TiO}_2$ , B: Activated Carbon, C:  $\text{TiO}_2$  / AC(1:1), d:  $\text{TiO}_2$  / AC(1:5)

## 1.2. X-ray diffraction (XRD)

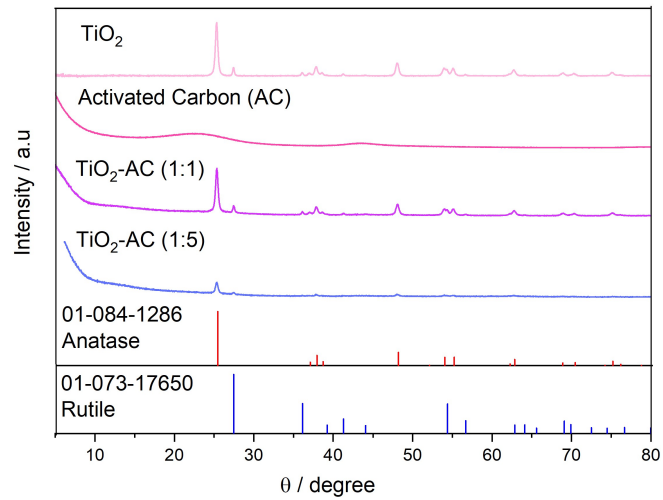

**Figure 2.** XRD

Figure S2 shows the XRD patterns of samples. The JCPDS database was used as a reference in determining the structure of samples. All peaks can be assigned to the two phases; no additional phases or contaminations are indicated. The diffractogram for the crystal structure Brookite was specifically tested for, since it is a common  $\text{TiO}_2$  structure, but no peaks matched. Another observation is the signal of activated carbon. Since activated carbon is an amorphous compound its diffractogram has no defined peaks. It is not perfectly amorphous, so some broad signals are seen. In the mixed samples the broad signals are present below the well defined  $\text{TiO}_2$  peaks. The ratio of anatase to rutile was calculated to be around 80:20. Activated carbon showed two characteristic peaks at around  $20^\circ$  to  $30^\circ$  and  $40^\circ$  to  $50^\circ$ , corresponding to the known peaks of activated carbon([2]). After synthesis the crystal structure didn't change. The spectrum also showed the characteristic peak of activated carbon at  $10^\circ$ , which indicates that after synthesis, the  $\text{TiO}_2/\text{AC (1:1 and 1:5)}$  samples contained anatase-and-rutile-phase  $\text{TiO}_2$  and AC, which match the SEM image. The peak intensity of anatase and rutile weakened when a higher concentration activated carbon was introduced into  $\text{TiO}_2$ . No unexpected phases were observed in this experiment. Next, the ratio between the two phases were calculated. For that a Rietveld Refinement was done.  $\text{TiO}_2$  was identified as consisting of two phases (shown in Figure S3): anatase and rutile. No brookite peak was found.

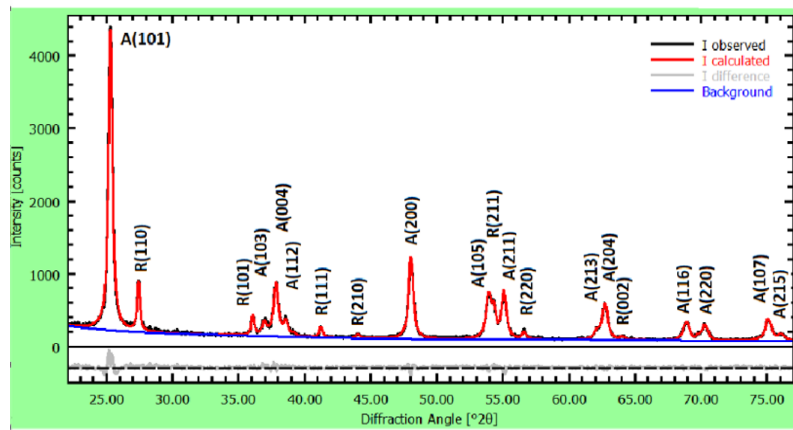

**Figure 3.** Facet measurement by using refinement Profex(Each peak has been assigned to a miller plane using JCPDS cards 01-084-1286 and 01-073-17650. A is Anatase and R is Rutile peaks.).

### 1.3. Brunauer-Emmett-Teller (BET) surface area

Table 1: Specific surface area, average particle size and total pore volume of samples.

| Sample                                | TiO <sub>2</sub> | AC           | TiO <sub>2</sub> -AC (1:1) | TiO <sub>2</sub> -AC (1:5) |
|---------------------------------------|------------------|--------------|----------------------------|----------------------------|
| Surface area (m <sup>2</sup> /g)      | 49.53            | 3907.80 (lm) | 1315.77 (1966.94 lm)       | 2166.31 (3268.95)          |
| Total Pore volume(cm <sup>3</sup> /g) | 1.74             | 0.33         | 1.58                       | 1.72                       |
| Average pore size                     | 7.04             | 1.21         | 2.41                       | 1.57                       |

The surface area, total pore volume and average pore size were measured. The surface area of activated carbon is determined using the Langmuir equation([3]), while the other parameters were determined by using the BET method. As shown in Table 1, activated carbon has the largest surface area and the smallest pore size. TiO<sub>2</sub> has the smallest surface area and the largest average pore size. The surface area decrease with doping the TiO<sub>2</sub>. The same trend are observed both with total pore volume and average pore size.

### 1.4. X-ray photoelectron spectroscopy (XPS)

Figure S4 and S5 present high resolution XPS spectra of carbon C 1s and titanium Ti 2p region for samples TiO<sub>2</sub>, AC, and 2 samples TiO<sub>2</sub> / AC with ratio 1:1 and 1:5. The Ti 2p signal remains the same for all samples meaning that the chemical state of Ti in the particles do not change. In the C 1s, carbon from C-C (285 eV), C-O (286 eV) and O-C=O (289 eV) is detected on the pure TiO<sub>2</sub> particles, probably small contamination from the synthesis method. The C 1s line for the TiO<sub>2</sub> / AC 1:1 with the highest content of particles is a combination of pure TiO<sub>2</sub> signal and AC signal.

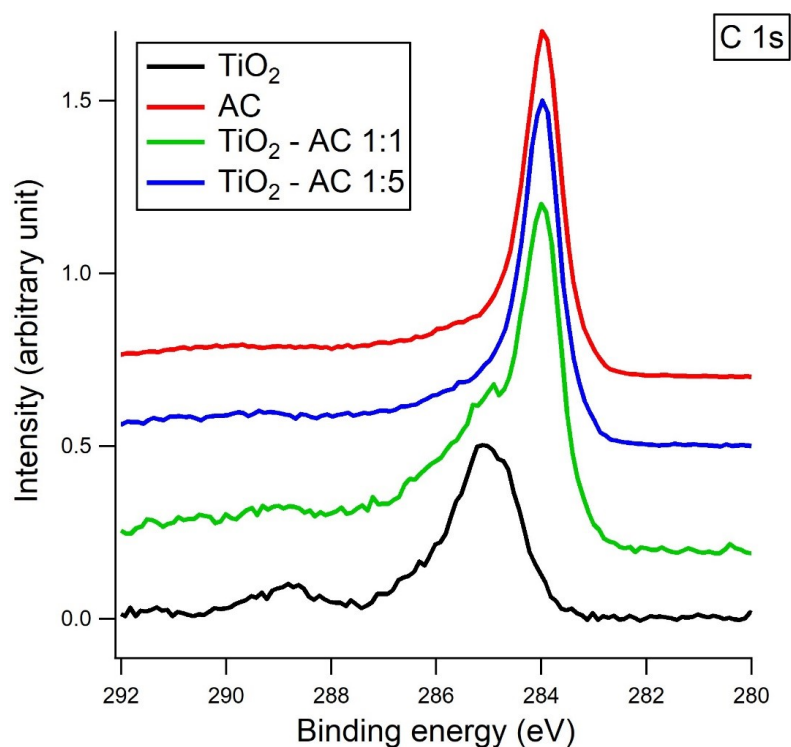

**Figure 4.** High resolution XPS spectra of C 1s region for  $\text{TiO}_2$ , AC, and 2 samples  $\text{TiO}_2$  – AC with ratio 1:1 and 1:5. The mixed sample with the highest content of  $\text{TiO}_2$  (green line) is a combination of  $\text{TiO}_2$  carbon signal (black line) and pure AC carbon signal (red line)

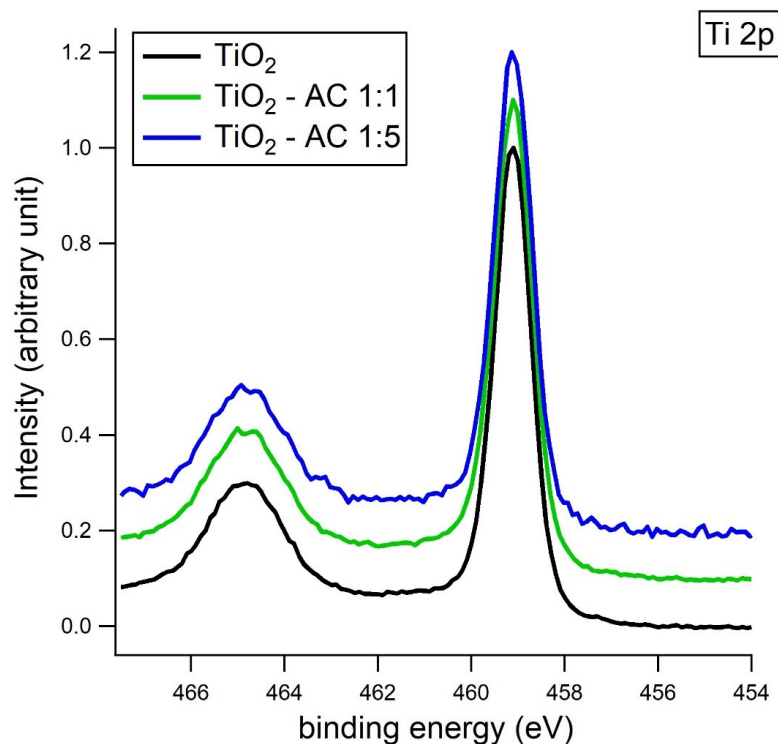

**Figure 5.** Chemical state of Ti 2p spectra of  $\text{TiO}_2$ ,  $\text{TiO}_2/\text{AC}(1:1)$ ,  $\text{TiO}_2/\text{AC}(1:5)$

53 In Figure S5 and S7, wide spectra for these four samples are displayed. No other  
 54 element than C, O and Ti are detected meaning that no contamination is observed.  
 55 It is clear than the signal from Ti (at 459 eV) is increasing with the amount in the

56 samples. The atomic percentages presented in Table 1 are derived from these graphs.  
 57 No contamination is detected and only C, O and Ti signals are observed. The relative  
 58 ratio between C and Ti varies with the amount of Ti in the sample with larger Ti signal  
 59 for pure  $\text{TiO}_2$  (black line) and smaller for  $\text{TiO}_2$  / AC (1:5) (blue line). Data have been  
 60 shifted in Y-axis for easier comparison.

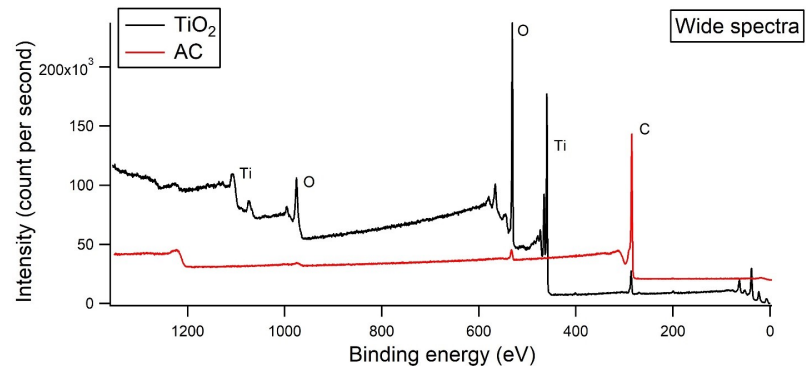

**Figure 6.** Wide XPS spectra of  $\text{TiO}_2$ , AC

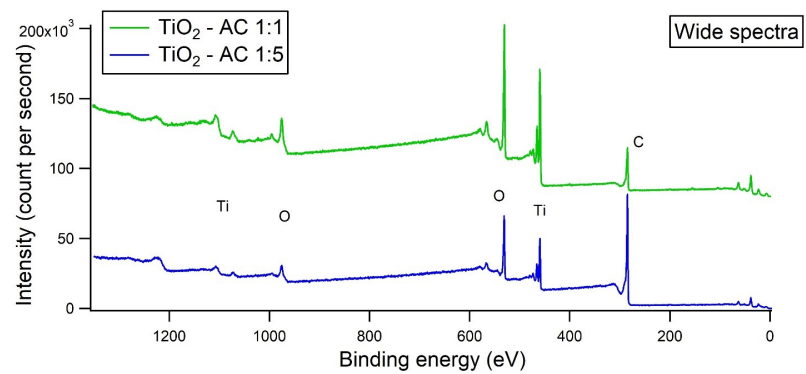

**Figure 7.** Wide XPS spectra of  $\text{TiO}_2$ , AC (top) and 2 samples  $\text{TiO}_2$  / AC with ratio 1:1 and 1:5 (bottom)

## 61 References

- 62 1. Sun, X.; Xie, M.; Travis, J.J.; Wang, G.; Sun, H.; Lian, J.; George, S.M. Pseudocapacitance of  
 63 amorphous  $\text{TiO}_2$  thin films anchored to graphene and carbon nanotubes using atomic layer  
 64 deposition. *The Journal of Physical Chemistry C* **2013**, *117*, 22497–22508.
- 65 2. Danmaliki, G.I.; Saleh, T.A. Effects of bimetallic Ce/Fe nanoparticles on the desulfurization  
 66 of thiophenes using activated carbon. *Chemical Engineering Journal* **2017**, *307*, 914–927.
- 67 3. Sposito, G. On the use of the Langmuir equation in the interpretation of “adsorption”  
 68 phenomena: II. The “two-surface” Langmuir equation. *Soil Science Society of America Journal*  
 69 **1982**, *46*, 1147–1152.
